# Supplementary material
Source: PubMed Central journal article supplement (PMC4649685)
Supplement: supp_mcu178_mcu178supp.pdf [file supp_mcu178_mcu178supp.pdf]

## SUPPLEMENTARY DATA

Fig. S1. Graph layout (cluster CL0009) identified by NGS, and dot-plot of the sequences of longest contigs of cluster 9 indicating the presence of tandem repeats in head-to-tail orientation.

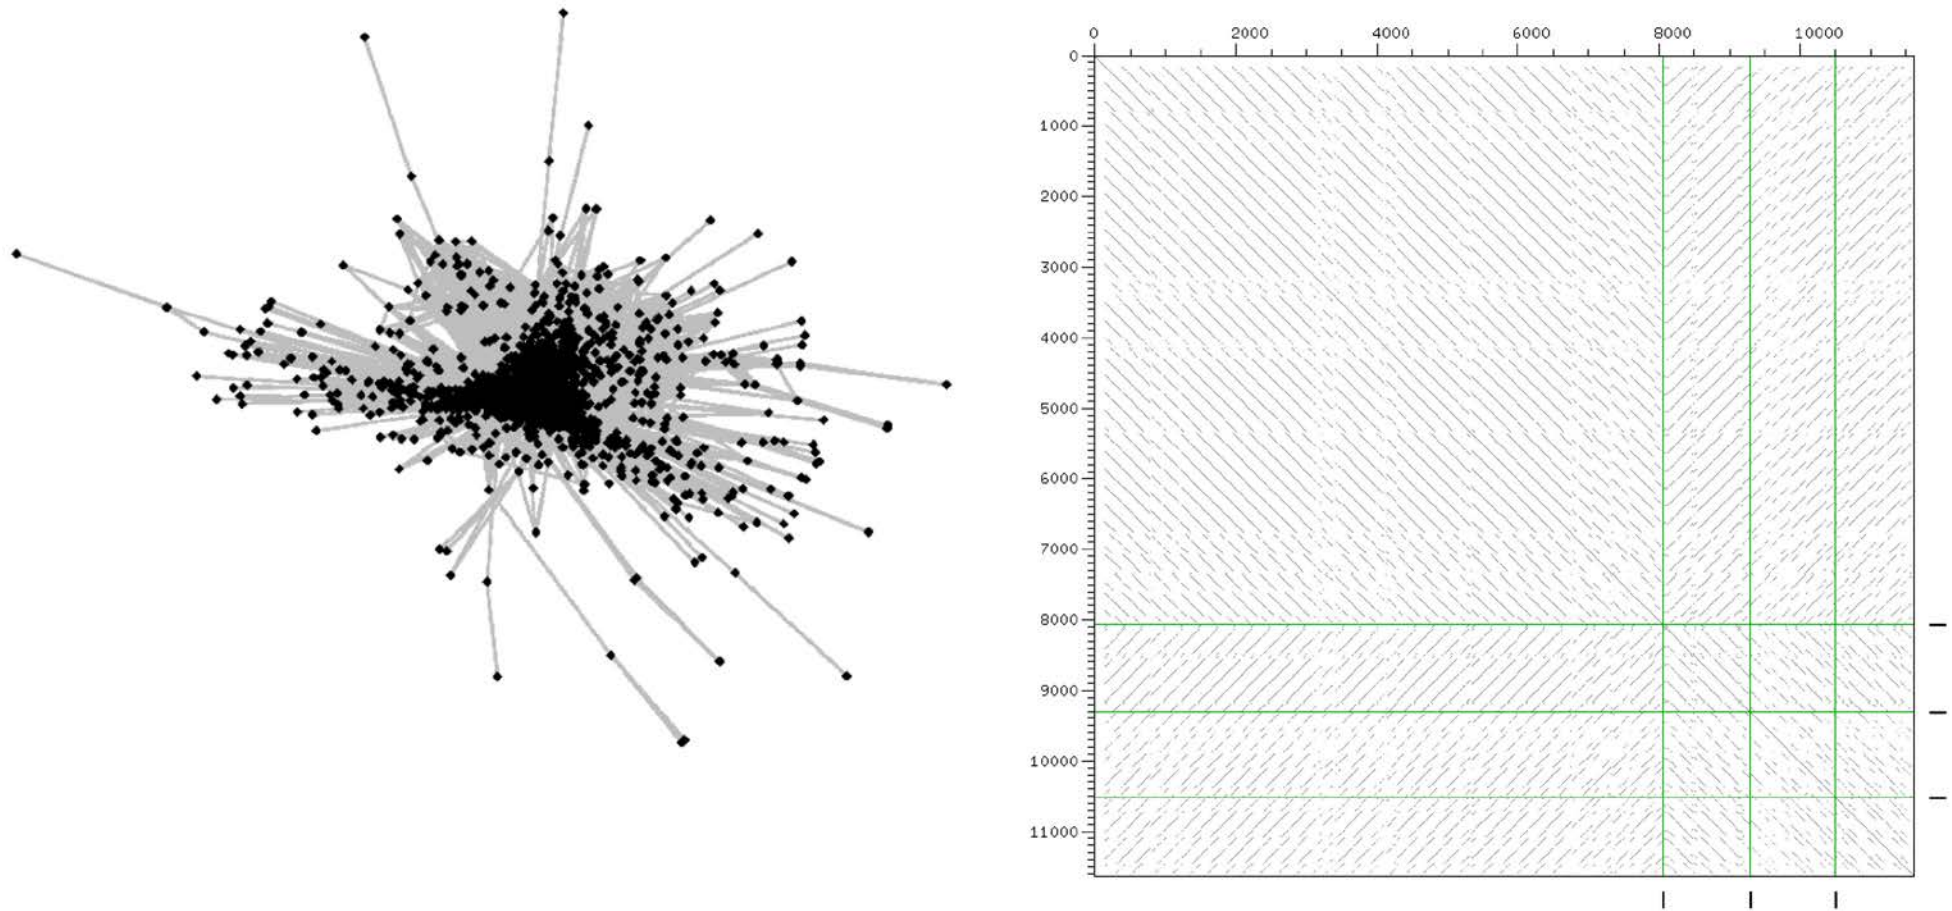

Fig. S2. Distribution of *PaB6* in pericentric and centromeric regions on all chromosomes in cytotype B<sup>6</sup>B<sup>6</sup>. Arrow indicates *PaB6* signal in extended centromeric region.

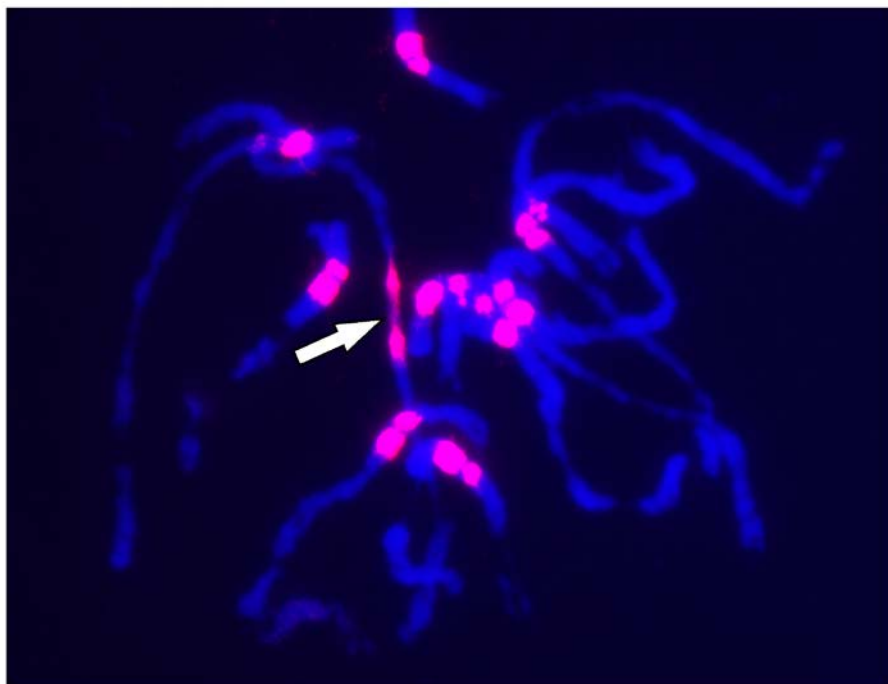

Fig. S3. *PaB6* in the B<sup>6</sup> genome (H247) restricted with *Bst*NI and *Scr*F1, showing high cytosine methylation of satellite monomers, particularly at CHG motifs.

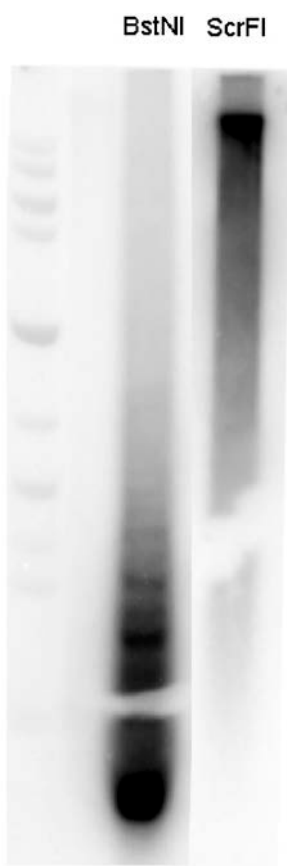

Table S1. Plants used and collection details, GenBank accession numbers (*PaB6*), and methods used for analysis. All plants cultivated in HBV (Vienna, Austria).

| Taxon (chromosome number, cytotype)      | Locality; Collection; accession number | Methods applied to analyze <i>PaB6</i> | GenBank accession numbers of <i>PaB6</i> fragments |                       |
|------------------------------------------|----------------------------------------|----------------------------------------|----------------------------------------------------|-----------------------|
| <i>P. hanburyi</i> ( $2n = 14$ )         | Turkey, Findikpinar; Speta; H115       | PCR, Seq, SB, FISH                     | KF897635-<br>KF897639                              |                       |
|                                          | Turkey, Findikpinar; Speta; H397       | PCR, Seq, SB, FISH <sup>1</sup>        | KF897640-<br>KF897642                              |                       |
|                                          | Turkey, Narlikuyu, Silifke; H231       | FISH, CNE                              | ---                                                |                       |
| <i>P. obtusifolium</i> ( $2n = 8$ )      | Morocco; Parker; H547                  | Seq, SB                                | KF897643-<br>KF897647                              |                       |
|                                          | Morocco; Parker; H563                  | PCR, FISH                              | ---                                                |                       |
|                                          | Morocco; Parker; H564                  | FISH                                   | ---                                                |                       |
|                                          | Spain; Parker; H559                    | PCR, Seq, SB                           | KF897648-<br>KF897652                              |                       |
|                                          | Spain; Parker; H540                    | SB, FISH <sup>1</sup> , CNE            | ---                                                |                       |
| <i>P. autumnale</i><br>( $2n = 14$ , AA) | Spain, Huelva; Parker; H541            | PCR, Seq, SB                           | KF897587-<br>KF897591                              |                       |
|                                          | Spain, Badajoz; Parker; H543           | Seq, SB, FISH <sup>1</sup>             | KF897592-<br>KF897596                              |                       |
|                                          | Spain, Jaen; Parker; H546              | SB                                     | ---                                                |                       |
|                                          | Spain, Huelva; Parker; H548            | SB, FISH, CNE                          | ---                                                |                       |
|                                          | Portugal, Peniche; Parker; H550        | PCR, SB, FISH                          | ---                                                |                       |
|                                          | Portugal, Peniche; Parker; H551        | FISH                                   | ---                                                |                       |
|                                          | Portugal, Peniche; Parker; H552        | SB                                     | ---                                                |                       |
|                                          | (math>2n = 10, B^5B^5)                 | Libya, Tobi; Parker; H566              | Seq, SB, CNE                                       | KF897597-<br>KF897601 |
|                                          |                                        | Libya, Tobi; Parker; H581              | FISH                                               | ---                   |
|                                          |                                        | Libya, Tobi; Parker; H582              | PCR, Seq, SB                                       | KF897602-<br>KF897606 |
|                                          | (math>2n = 12, B^6B^6)                 | Libya, Nagasa; Parker; H640            | PCR, FISH                                          | ---                   |
|                                          |                                        | Greece, Crete; Speta; H166             | PCR, Seq, SB                                       | KF897612-<br>KF897616 |
|                                          |                                        | Greece, Crete; Speta; H170             | SB, FISH                                           | ---                   |
| Greece, Crete; Speta; H195               |                                        | Seq, SB, FISH, CNE                     | KF897617-<br>KF897620                              |                       |
| Greece, Crete; Speta; H271               |                                        | SB                                     | ---                                                |                       |
| Greece, Crete; Speta; H274               |                                        | SB, FISH                               | ---                                                |                       |
| Greece, Crete; Speta; H427               |                                        | PCR, Seq, SB, FISH, CNE                | KF897607-<br>KF897611                              |                       |
| Greece, Crete; Speta; H455               |                                        | SB                                     | ---                                                |                       |
| Greece, Crete; Speta; H468               |                                        | FISH <sup>1</sup>                      | ---                                                |                       |
| (math>2n = 14, B^7B^7)                   |                                        | Greece, Crete; Speta; H47              | SB, FISH <sup>3</sup>                              | ---                   |
|                                          | Greece, Crete; Speta; H58              | Seq, SB                                | KF897630,<br>KF897632-<br>KF897634                 |                       |
|                                          | Greece, Crete; Speta; H89              | Seq, SB                                | KF897625-<br>KF897629                              |                       |
|                                          | Greece, Crete; Speta; H174             | SB                                     | ---                                                |                       |
|                                          | Greece, Crete; Speta; H440             | SB, FISH <sup>1,3</sup>                | ---                                                |                       |
|                                          | Greece, Crete; Speta; H464             | SB                                     | ---                                                |                       |
|                                          | Greece, Lefkas, Nikiana; Speta; H432   | SB                                     | ---                                                |                       |
|                                          | Greece, Kalamitsi; Speta; H450         | SB, FISH <sup>3</sup>                  | ---                                                |                       |
|                                          | Greece, Poros; Speta; H535             | Seq, SB                                | KF897621-<br>KF897624                              |                       |
|                                          | Greece, Rhodes; Speta; H137            | FISH <sup>2</sup>                      | ---                                                |                       |
|                                          | Israel, Nene Han; Parker; H612         | FISH <sup>3</sup>                      | ---                                                |                       |

|                                           |                                            |                                    |     |
|-------------------------------------------|--------------------------------------------|------------------------------------|-----|
|                                           | Italy, Sicily; Speta; H428                 | PCR, SB, FISH <sup>3</sup>         | --- |
|                                           | Italy, Sicily; Speta; H403                 | SB                                 | --- |
|                                           | Montenegro; Speta; H422                    | FISH <sup>1,2</sup>                | --- |
|                                           | Montenegro; Speta; H424                    | PCR, SB, FISH <sup>1,2</sup> , CNE | --- |
|                                           | Montenegro; Speta; H430                    | SB                                 | --- |
|                                           | Serbia, Siget-Baun; Rat; H576              | FISH <sup>2</sup>                  | --- |
|                                           | Turkey; Speta; H179                        | SB                                 | --- |
|                                           | Ukraine, Nikita; Kish; H591                | FISH <sup>2</sup>                  | --- |
|                                           | Speta; H228                                | FISH <sup>2</sup>                  | --- |
|                                           | Speta; H433                                | SB                                 | --- |
| Diploid homoploid hybrids                 |                                            |                                    |     |
| (2n = 12, AB <sup>5</sup> )               | Cross pollination experiment; Parker; H567 | SB, FISH <sup>1</sup>              | --- |
| (2n = 12, B <sup>5</sup> B <sup>7</sup> ) | Cross pollination experiment; Parker; H633 | FISH                               | --- |
| (2n = 13, B <sup>6</sup> B <sup>7</sup> ) | Greece, Mykonos; Speta; H294               | SB                                 | --- |
|                                           | Greece, Crete; Speta; H211                 | FISH <sup>1</sup>                  | --- |
|                                           | Greece, Crete; Speta; H518                 | FISH                               | --- |
|                                           | Greece, Crete; Speta; H700                 | FISH                               | --- |
| Outgroups                                 |                                            |                                    |     |
| <i>Barnardia scilloides</i>               | Cult. HBV; Jang 1                          | PCR                                | --- |
| <i>Othocallis mischtschenkoana</i>        | Cult. HBV; Li 778                          | PCR                                | --- |
| <i>Othocallis siberica</i>                | Cult. HBV; Hyac2159/1                      | PCR                                | --- |

Seq, Sequencing; SB, Southern blot; DB, Dot blot; FISH, Fluorescence *in situ* hybridization with 5S rDNA and *PaB6*; CNE, copy number estimation via slot blot; <sup>1</sup>, FISH with PNA telomeric probe (CCCTAA)<sub>3</sub> and *PaB6*; <sup>2</sup>duplicated and <sup>3</sup>single locus of 5S rDNA in chromosome 1.

Table S2. Sequence similarity (%) of cloned monomers of *PaB6* satellite DNA within and between different diploid cytotypes of *Prospero* given as: (minimum), average ± s.d., (maximum).<sup>1</sup>

|                               | <i>P. autumnale</i><br>B <sup>7</sup> B <sup>7</sup> | <i>P. autumnale</i><br>B <sup>6</sup> B <sup>6</sup> | <i>P. autumnale</i><br>B <sup>5</sup> B <sup>5</sup> | <i>P. autumnale</i><br>AA | <i>P. hanburyi</i>       | <i>P. obtusifolium</i>   |
|-------------------------------|------------------------------------------------------|------------------------------------------------------|------------------------------------------------------|---------------------------|--------------------------|--------------------------|
| B <sup>7</sup> B <sup>7</sup> | (95) 98.4<br>± 1.2 (100)                             |                                                      |                                                      |                           |                          |                          |
| B <sup>6</sup> B <sup>6</sup> | (94) 98.0<br>± 1.3 (100)                             | (95) 96.5<br>± 0.9 (99)                              |                                                      |                           |                          |                          |
| B <sup>5</sup> B <sup>5</sup> | (92) 97.5<br>± 1.6 (100)                             | (94) 96.6<br>± 1.1 (99)                              | (94) 96.5<br>± 1.2 (99)                              |                           |                          |                          |
| AA                            | (95) 98.3<br>± 1.1 (100)                             | (94) 96.8<br>± 1.2 (100)                             | (94) 96.5<br>± 1.3 (100)                             | (94) 96.4<br>± 1.5 (100)  |                          |                          |
| <i>P. hanburyi</i>            | (94) 97.8<br>± 1.5 (100)                             | (94) 96.2<br>± 1.0 (100)                             | (94) 96.1<br>± 1.2 (100)                             | (94) 96.5<br>± 1.3 (100)  | (95) 96.0<br>± 1.3 (100) |                          |
| <i>P. obtusifolium</i>        | (95) 98.1<br>± 1.2 (100)                             | (93) 96.4<br>± 1.2 (100)                             | (93) 96.5<br>± 1.4 (100)                             | (93) 96.6<br>± 1.6 (100)  | (93) 96.2<br>± 1.3 (100) | (93) 96.4<br>± 1.5 (100) |

<sup>1</sup>Comparison of all vs. all: (92) 97.55 ± 1.5 (100).

Table S3. Characterization of 5S rDNA and satellite DNA *PaB6* loci in chromosomes of diploid species, cytotypes and hybrids of the genus *Prospero*.

| Cytotype                                | Number and location of 5S rDNA loci                                                               | Number and location of <i>PaB6</i> loci                                                                  | Signal strength |
|-----------------------------------------|---------------------------------------------------------------------------------------------------|----------------------------------------------------------------------------------------------------------|-----------------|
| <i>Prospero obtusifolium</i>            |                                                                                                   |                                                                                                          |                 |
| (2n = 8)                                | 3: L-P <sup>2</sup> , L-P <sup>3</sup> , S-P <sup>3</sup>                                         | –                                                                                                        | –               |
| <i>P. hanburyi</i>                      |                                                                                                   |                                                                                                          |                 |
| (2n = 14)                               | 1: L-P <sup>1</sup>                                                                               | –                                                                                                        | –               |
| <i>P. autumnale</i> complex             |                                                                                                   |                                                                                                          |                 |
| AA (2n = 14)                            | 1: S-P <sup>2</sup>                                                                               | 1: S-P <sup>5</sup>                                                                                      | Very weak       |
| B <sup>7</sup> B <sup>7</sup> (2n = 14) | 1: L-D <sup>1**</sup>                                                                             | 3: S-P <sup>1, 2, 4</sup>                                                                                | +               |
|                                         | 1: L-D <sup>1*</sup>                                                                              | 6: S-P <sup>1, 2, 4, 5, 6, 7</sup>                                                                       | ++              |
| B <sup>6</sup> B <sup>6</sup> (2n = 12) | 2: L-D <sup>1</sup> , S-P <sup>2</sup>                                                            | 6: S-P <sup>1-hetero, 2, 3, 4, 5, 6</sup>                                                                | +++++           |
|                                         | 2: L-D <sup>1</sup> , S-P <sup>2</sup>                                                            | 6: S-P <sup>1, 2, 3, 4, 5, 6</sup>                                                                       | +++++           |
| B <sup>5</sup> B <sup>5</sup> (2n = 10) | 1: L-D <sup>1</sup>                                                                               | 4: S-P <sup>1, 2, 4, 5</sup>                                                                             | +++             |
|                                         | 1: L-D <sup>1</sup>                                                                               | 5: S-P <sup>1, 2, 3-hetero, 4, 5</sup>                                                                   | +++             |
| Diploid homoploid hybrids               |                                                                                                   |                                                                                                          |                 |
| AB <sup>5</sup> (2n = 12)               | 1 (A): S-P <sup>2</sup> ; 1 (B <sup>5</sup> ): L-D <sup>1</sup>                                   | 4 (B <sup>5</sup> ): S-P <sup>1, 2, 4, 5</sup>                                                           | –;++++          |
| B <sup>5</sup> B <sup>7</sup> (2n = 12) | 1 (B <sup>5</sup> ): L-D <sup>1</sup> ; 1 (B <sup>7</sup> ): L-D <sup>1*</sup>                    | 4 (B <sup>5</sup> ): S-P <sup>1, 2, 4, 5</sup> ;<br>6 (B <sup>7</sup> ): S-P <sup>1, 2, 3, 4, 5, 6</sup> | ++++;+          |
| B <sup>6</sup> B <sup>7</sup> (2n = 13) | 2 (B <sup>6</sup> ): L-D <sup>1</sup> , S-P <sup>2</sup> ; 1 (B <sup>7</sup> ): L-D <sup>1*</sup> | 6 (B <sup>6</sup> ): S-P <sup>1, 2, 3, 4, 5, 6</sup>                                                     | +++++; –        |

Note: S, short arm; L, long arm; P, pericentric region; D, distal region; <sup>1-7</sup>, number of the chromosome; \*\*, duplicated 5S<sup>1</sup> rDNA signal; \*, single 5S<sup>1</sup> rDNA signal; +, ++, +++ etc., strength of *PaB6* signals; – no *PaB6* signals.
